# Supplementary material for: Dispersion, ionic bonding and vibrational shifts in phospho-aluminosilicate glasses
Source: Royal Society of Chemistry journal article supplement (doi:10.1039/d4cp00685b), 2024-01-01
Supplement: d4cp00685b1.pdf [file d4cp00685b1.pdf]

# Dispersion, ionic bonding and vibrational shifts in phospho- aluminosilicate glasses

Thilo Grammes, Dominique de Ligny, Dintu Mathew, Kristin Griebenow, Franziska Scheffler, Florian Lindner, Claudia Aichele, Jan Dellith, Leo van Wüllen, Efstratios I. Kamitsos, Delia S. Brauer

## Supplementary Information

### Summary of infrared and Raman spectroscopy band assignments

In the IR spectra of phosphate-free glasses (Figure S2c) the maximum shifting from 982 to 1021  $\text{cm}^{-1}$  corresponds to asymmetric Si-O stretching in  $Q_{\text{Si}}^4$  units.<sup>1-3</sup> and the shoulder shifting from 1100 to 1150  $\text{cm}^{-1}$  corresponds to a vibration of  $Q^4$  units.<sup>1,3</sup> With phosphate incorporation (Figure S2a,e), this shoulder became more pronounced due to a new phosphate-related band (asymmetric P-O stretching in  $Q_{\text{P}}^2$  units)<sup>4-6</sup> and shifted from 1130 to 1170  $\text{cm}^{-1}$  with increasing silica content (Figure S2e).

The Raman spectra of phosphate-free glasses (Figure S2d) comprised three bands, of which one high frequency shoulder was only visible under cross-polarisation.<sup>7</sup> Here, the maximum shifting from 1005 to 1088  $\text{cm}^{-1}$  was assigned to the  $Q_{\text{Si}/\text{Al}}^{4,\text{low}}$  mode and the hidden high frequency shoulder to the  $Q_{\text{Si}/\text{Al}}^{4,\text{high}}$  mode (individual bands are indicated in Figure S3). The two modes correspond to stretching of tetrahedral units with smaller ( $Q_{\text{Si}/\text{Al}}^{4,\text{low}}$ ) and larger ( $Q_{\text{Si}/\text{Al}}^{4,\text{high}}$ ) inter-tetrahedral bond angles.<sup>8-15</sup> A shoulder at lower frequencies, shifting from 970 to 1000  $\text{cm}^{-1}$ , became visible with increasing silica content, and was assigned to the  $T_{2s}$  mode of  $Q^4$  units (two oxygens moving towards the tetrahedral centre while the other two move away from it).<sup>9-13</sup>

After phosphate incorporation, the Raman spectra were dominated by two new features. A new maximum shifted from 1056 to 1068  $\text{cm}^{-1}$  with increasing  $\text{P}_2\text{O}_5$  content (Figure S2b) and from 1050 to 1076  $\text{cm}^{-1}$  with increasing  $\text{SiO}_2$  content (Figure S2f). A new high frequency shoulder shifted from 1200 to 1215  $\text{cm}^{-1}$  with increasing  $\text{P}_2\text{O}_5$  content (Figure S2b) and from 1195 to 1210  $\text{cm}^{-1}$  with increasing  $\text{SiO}_2$  content (Figure S2f). The phosphate-related maximum was assigned to the symmetric stretching and the shoulder to asymmetric stretching of  $Q_{\text{P}}^2$  units.<sup>4-6,16-18</sup> Both phosphate-related Raman bands were additionally assigned to Al-O-P bonds,<sup>19-22</sup> thus supporting the interpretation of the refractive index trend with increasing phosphate content as being partially caused by Al-O-P bonds.

### Dispersion formula from refractive index fitting

The dispersion fits were done with a two-term Sellmeier approximation, which already yielded very good fits to the data (see below). A third term in the Sellmeier fit could not be added since more investigated wavelengths would have been required.

The goodness of the Sellmeier fit is confirmed by high coefficients of determination ( $R^2 > 0.98$  for all glasses, see Suppl. Table S1). To provide an additional measure of the accuracy of refractive indices calculated from the Sellmeier fit, we determined the standard deviation  $\sigma$  of the fit as the square root of the Bessel-corrected unbiased sample variance (all values  $< 9e^{-4}$ ; see Suppl. Table S1).

$$\sigma = \sqrt{\sum_{i=1}^k \frac{(n_{measured} - n_{fitted})^2}{k - 1}} \quad (S1)$$

Here,  $k$  is the number of investigated wavelengths.

## Supplementary Figures

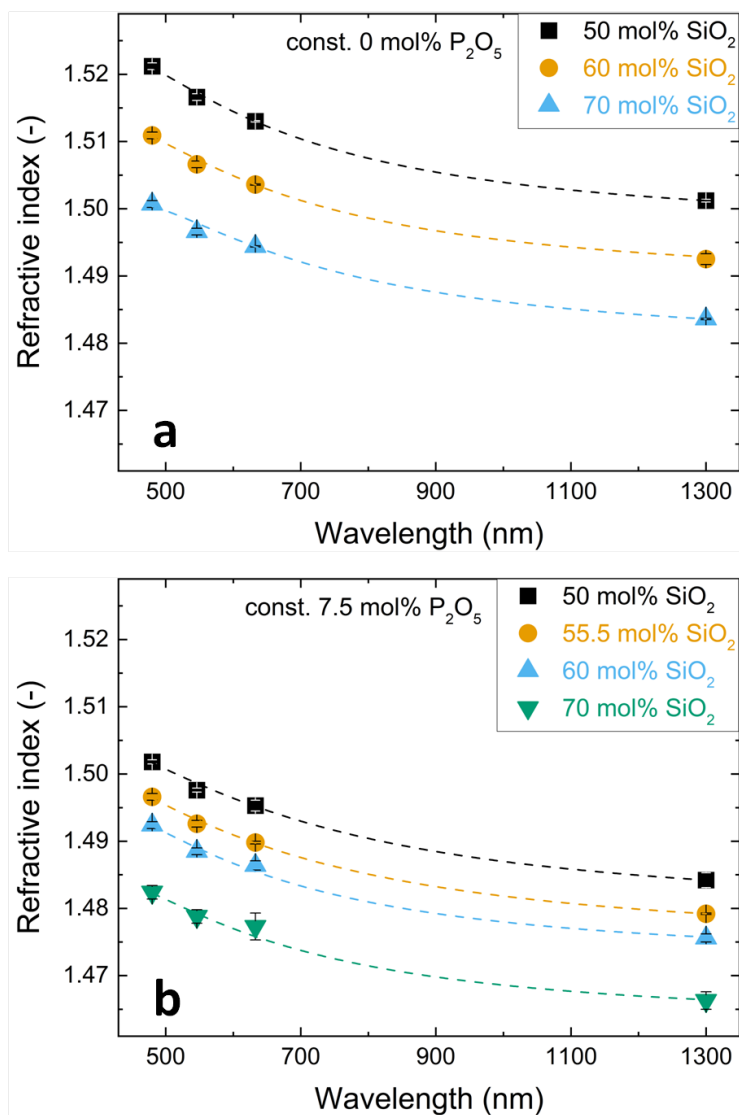

**Figure S1.** Changes in refractive index with wavelength for the glass series with increasing silica content and (a) constant 0 mol% P<sub>2</sub>O<sub>5</sub> or (b) constant 7.5 mol% P<sub>2</sub>O<sub>5</sub>. Dashed lines are fits with a two-term Sellmeier approximation (details in Suppl. Table S1).

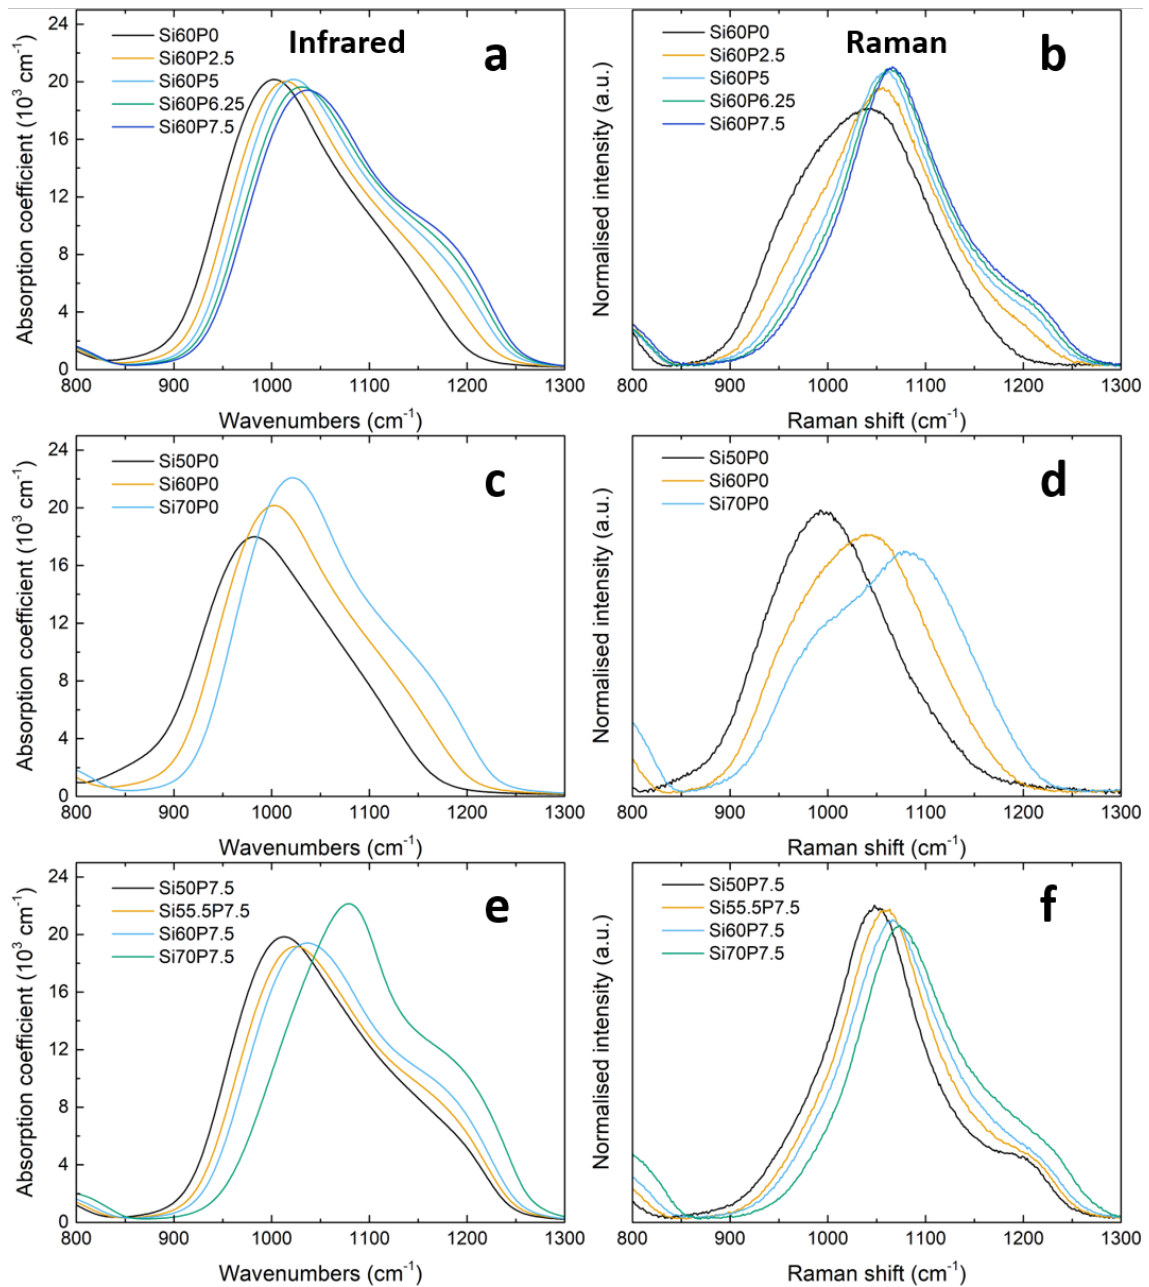

**Figure S2.** High frequency envelope of the IR (left) and Raman spectra (right) for the three glass series with (a,b) increasing  $P_2O_5$  content (constant 60 mol%  $SiO_2$ ), (c,d) with increasing  $SiO_2$  content and constant  $P_2O_5$  contents of 0 mol% or (e,f) 7.5 mol%. A shift of the envelope to higher wavenumbers occurred in all series. For details see text.

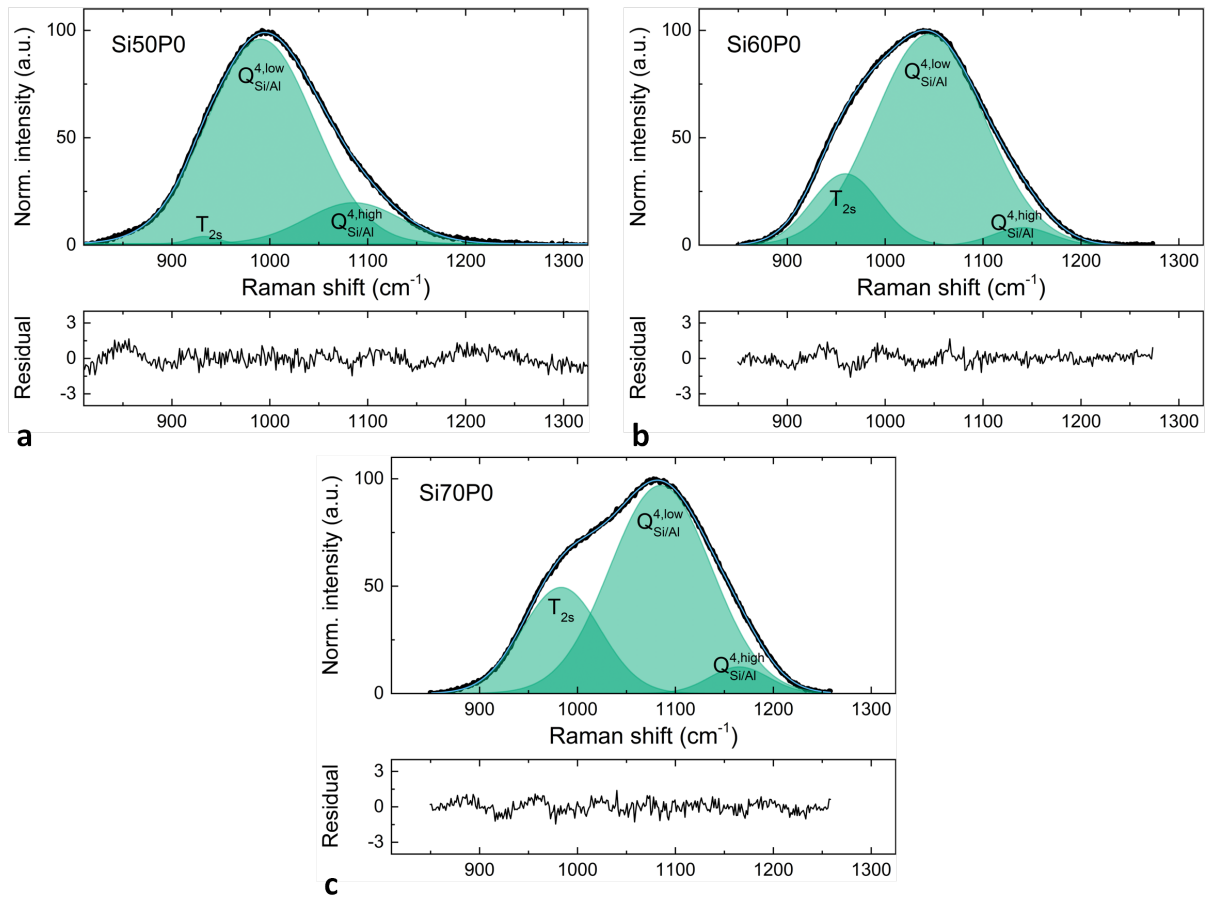

**Figure S3.** Deconvoluted high frequency Raman spectra and residuals for the phosphate-free glasses (a) Si50P0, (b) Si60P0 and (c) Si70P0. Experimental data are presented in black, deconvoluted bands in green and the sum curve of the fitted model in blue.

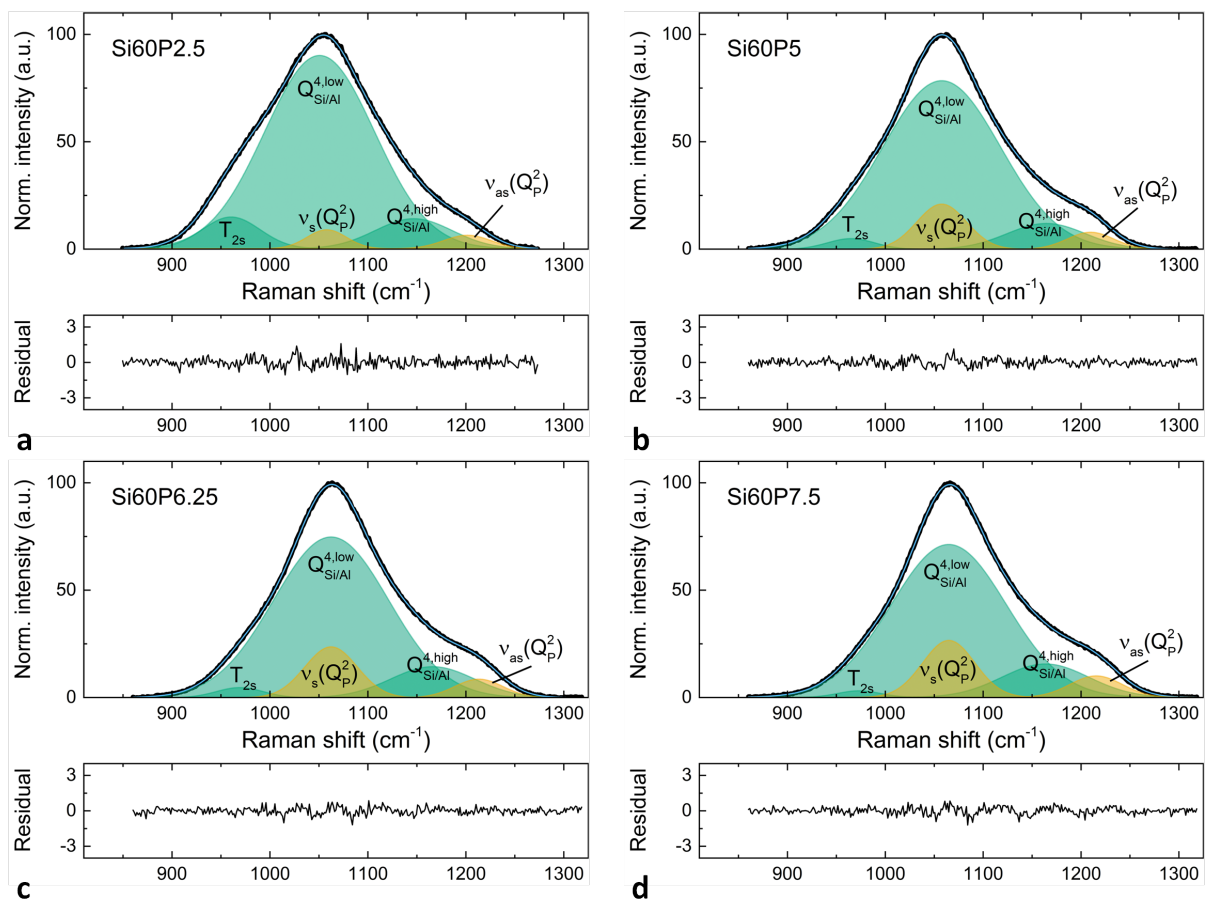

**Figure S4.** Deconvoluted high frequency Raman spectra and residuals for the phosphate-containing glasses (a) Si60P2.5, (b) Si60P5, (c) Si60P6.25 and (d) Si60P7.5. Experimental data are presented in black, deconvoluted bands in green and orange and the sum curve of the fitted model in blue.

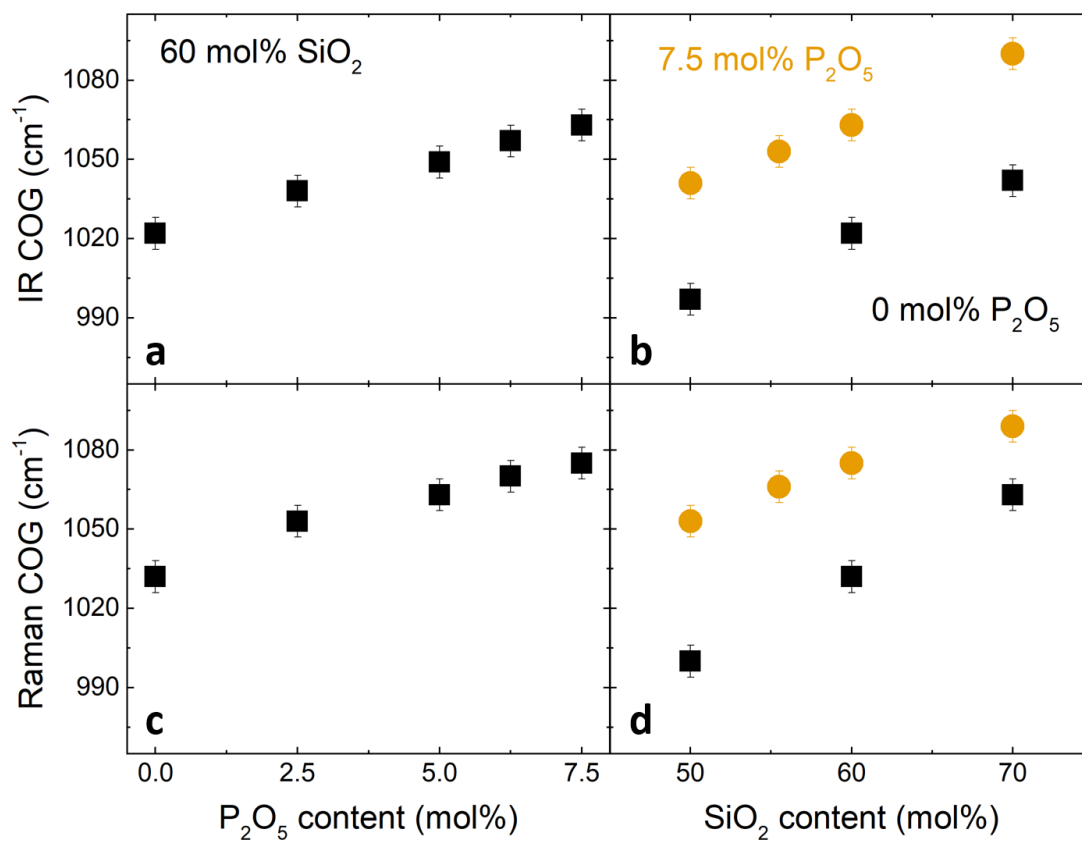

**Figure S5.** Changes in the centre of gravity (COG) of the high frequency envelope of the IR (a,b) and Raman spectra (c,d) with (a,c) increasing P<sub>2</sub>O<sub>5</sub> content and constant 60 mol% SiO<sub>2</sub> and with (b,d) increasing SiO<sub>2</sub> content and constant P<sub>2</sub>O<sub>5</sub> contents of 0 mol% (black squares) or 7.5 mol% (orange circles).

## Supplementary Tables

**Table S1.** Fitting results of a two-term Sellmeier approximation for the dispersion of the studied glasses and Abbe numbers.

| Series     | Glass      | B <sub>1</sub> | C <sub>1</sub> | B <sub>2</sub> | C <sub>2</sub> | R <sup>2</sup> | Standard deviation of fit | Abbe number v <sub>e</sub> |
|------------|------------|----------------|----------------|----------------|----------------|----------------|---------------------------|----------------------------|
| Series i   | Si60P0     | -96.77284      | 41987.96731    | 97.99026       | 41662.52717    | 0.99561        | 5.21E-04                  | 65.3983                    |
|            | Si60P2.5   | -128.02863     | 39372.20971    | 129.22496      | 39153.10215    | 0.99992        | 7.34E-05                  | 58.06158                   |
|            | Si60P5     | -144.14989     | 39419.6307     | 145.33345      | 39220.24242    | 0.99776        | 3.54E-04                  | 64.59081                   |
|            | Si60P6.25  | -127.82644     | 41124.75418    | 129.00052      | 40891.05941    | 0.99595        | 4.72E-04                  | 65.41014                   |
|            | Si60P7.5   | -78.39322      | 39315.03854    | 79.56104       | 38953.18424    | 0.99234        | 6.29E-04                  | 66.84926                   |
| Series ii  | Si50P0     | -86.81553      | 43142.92958    | 88.05699       | 42772.27966    | 0.99787        | 3.95E-04                  | 59.46718                   |
|            | Si60P0     | -96.77284      | 41987.96731    | 97.99026       | 41662.52717    | 0.99561        | 5.21E-04                  | 65.3983                    |
|            | Si70P0     | -110.08837     | 45860.55428    | 111.27796      | 45548.92397    | 0.98921        | 7.58E-04                  | 73.61894                   |
| Series iii | Si50P7.5   | -116.60929     | -30668.19522   | 117.79875      | -30153.75974   | 0.99359        | 6.02E-04                  | 71.04377                   |
|            | Si55.5P7.5 | -85.30115      | -27779.19186   | 86.47678       | -27145.05736   | 0.99754        | 3.69E-04                  | 67.93973                   |
|            | Si60P7.5   | -78.39322      | 39315.03854    | 79.56104       | 38953.18424    | 0.99234        | 6.29E-04                  | 66.84926                   |
|            | Si70P7.5   | -57.507        | 39128.27412    | 58.64782       | 38647.64685    | 0.98318        | 9.00E-04                  | 68.81379                   |

**Table S2.** Overview of electronic polarisability,  $\alpha_m$  (Å<sup>3</sup>), oxygen polarisability,  $\alpha_{O_2-}$  (Å<sup>3</sup>), theoretical (and experimental) optical basicity,  $\Lambda_{th}$  and  $\Lambda_{exp}$ , and the centre of gravity (COG) of the high frequency envelope of IR and Raman spectra (cm<sup>-1</sup>).

| Series        | Glass      | $\alpha_m$    | $\alpha_{O_2-}$ | $\Lambda_{th}$ ( $\Lambda_{exp}$ ) | IR COG   | Raman COG |
|---------------|------------|---------------|-----------------|------------------------------------|----------|-----------|
| Series i (Pb) | Si60P0     | 3.272 ± 0.013 | 1.580 ± 0.007   | 0.58 (0.57)                        | 1022 ± 6 | 1032 ± 6  |
|               | Si60P2.5   | 3.346 ± 0.014 | 1.561 ± 0.007   | 0.56                               | 1038 ± 6 | 1053 ± 6  |
|               | Si60P5     | 3.417 ± 0.014 | 1.541 ± 0.007   | 0.55 (0.54)                        | 1049 ± 6 | 1063 ± 6  |
|               | Si60P6.25  | 3.450 ± 0.014 | 1.531 ± 0.007   | 0.54                               | 1057 ± 6 | 1070 ± 6  |
|               | Si60P7.5   | 3.497 ± 0.015 | 1.528 ± 0.007   | 0.53 (0.52)                        | 1063 ± 6 | 1075 ± 6  |
| Series ii     | Si50P0     | 3.385 ± 0.014 | 1.627 ± 0.007   | 0.61                               | 997 ± 6  | 1000 ± 6  |
|               | Si60P0     | 3.272 ± 0.013 | 1.580 ± 0.007   | 0.58                               | 1022 ± 6 | 1032 ± 6  |
|               | Si70P0     | 3.192 ± 0.013 | 1.550 ± 0.007   | 0.56                               | 1042 ± 6 | 1063 ± 6  |
| Series iii    | Si50P7.5   | 3.572 ± 0.015 | 1.553 ± 0.007   | 0.55                               | 1041 ± 6 | 1053 ± 6  |
|               | Si55.5P7.5 | 3.522 ± 0.015 | 1.535 ± 0.007   | 0.54                               | 1053 ± 6 | 1066 ± 6  |
|               | Si60P7.5   | 3.497 ± 0.015 | 1.528 ± 0.007   | 0.53                               | 1063 ± 6 | 1075 ± 6  |
|               | Si70P7.5   | 3.425 ± 0.016 | 1.504 ± 0.007   | 0.51                               | 1090 ± 6 | 1089 ± 6  |

Errors for optical basicity are estimated to be about 0.01.



**Table S3.** Overview of IR and Raman spectroscopy band assignments. Band positions (in wavenumbers) are given for each of the three glass series (with constant 60 mol% SiO<sub>2</sub>, constant 0 mol% P<sub>2</sub>O<sub>5</sub> and constant 7.5 mol% P<sub>2</sub>O<sub>5</sub>, respectively).

| Wavenumber range (cm <sup>-1</sup> ) |                                         |                                           | Assignments                                                                                             |
|--------------------------------------|-----------------------------------------|-------------------------------------------|---------------------------------------------------------------------------------------------------------|
| Series i                             | Series ii                               | Series iii                                |                                                                                                         |
| 60 mol%<br>SiO <sub>2</sub>          | 0 mol%<br>P <sub>2</sub> O <sub>5</sub> | 7.5 mol%<br>P <sub>2</sub> O <sub>5</sub> |                                                                                                         |
| <b>Infrared</b>                      |                                         |                                           |                                                                                                         |
| 1003-1037                            | 982-1021                                | 1013-1079                                 | Q <sub>Si</sub> <sup>4</sup> asymmetric stretching <sup>1-3,23</sup>                                    |
| 1100-n.d. <sup>¶*</sup>              | 1100-1150*                              | n.d.                                      | Q <sup>4</sup> units <sup>1,3</sup>                                                                     |
| 1170*                                | -                                       | 1170*                                     | Asymmetric P-O stretching in Q <sub>P</sub> <sup>2</sup> units <sup>4-6</sup>                           |
| <b>Raman</b>                         |                                         |                                           |                                                                                                         |
| 985-1027 <sup>††,†</sup>             | 970-1000 <sup>†</sup>                   | n.d.                                      | T <sub>2s</sub> tetrahedral mode <sup>‡</sup> <sup>9-13</sup>                                           |
| 1048-n.d.                            | 1005-1088                               | n.d.                                      | Q <sub>Si/Al</sub> <sup>4,low</sup> tetrahedral mode <sup>‡‡</sup> <sup>9-13</sup>                      |
| 1056-1068                            | -                                       | 1050-1076                                 | Q <sub>P</sub> <sup>2</sup> symmetric stretching <sup>4-6,16-18</sup><br>Al-O-P bonds <sup>19-22</sup>  |
| 1070-n.d. <sup>*†</sup>              | 1040-1090 <sup>*†</sup>                 | n.d.                                      | Q <sub>Si/Al</sub> <sup>4,high</sup> tetrahedral mode <sup>‡‡</sup> <sup>9-13</sup>                     |
| 1200-1215*                           | -                                       | 1195-1210*                                | Q <sub>P</sub> <sup>2</sup> asymmetric stretching <sup>4-6,16-18</sup><br>Al-O-P bonds <sup>19-22</sup> |

\* Larger uncertainty of band position ( $\pm 20$  cm<sup>-1</sup>) because only shoulders are available for determination.

¶ n.d.: Not distinguishable because band was hidden under phosphate-related bands.

† Position determined from VH Raman spectra.

†† Position determined from spectra measured at 514 nm excitation instead of 488 nm. At 488 nm the band was not clearly distinguishable because of luminescence.

‡ Stretching of TO<sub>4</sub> tetrahedra with two O moving towards T and the other two O moving away from it.

‡‡ Stretching of Q<sub>Si/Al</sub><sup>4</sup> units with larger (Q<sub>Si/Al</sub><sup>4,high</sup>) or smaller (Q<sub>Si/Al</sub><sup>4,low</sup>) intertetrahedral angles.

## References cited in supplement

1. M. D. Ingram, J. E. Davidson, A. M. Coats, E. I. Kamitsos and J. A. Kapoutsis, *Glastechnische Berichte - Glass Science and Technology*, 2000, **73**, 89-104.
2. E. I. Kamitsos, A. P. Patsis and G. Kordas, *Physical Review B*, 1993, **48**, 12499-12505.
3. E. Stavrou, D. Palles, E. I. Kamitsos, A. Lipovskii, D. Tagantsev, Y. Svirko and S. Honkanen, *Journal of Non-Crystalline Solids*, 2014, **401**, 232-236.
4. K. Griebenow, U. Hoppe, D. Möncke, E. I. Kamitsos and L. Wondraczek, *Journal of Non-Crystalline Solids*, 2017, **460**, 136-145.
5. I. Konidakis, C. P. E. Varsamis, E. I. Kamitsos, D. Möncke and D. Ehrt, *Journal of Physical Chemistry C*, 2010, **114**, 9125-9138.
6. L. L. Velli, C. P. E. Varsamis, E. I. Kamitsos, D. Möncke and D. Ehrt, *Physics and Chemistry of Glasses*, 2005, **46**, 178-181.
7. T. Grammes, D. de Ligny, F. Scheffler, A. Nizamutdinova, L. van Wüllen, E. I. Kamitsos, J. Massera and D. S. Brauer, *The Journal of Physical Chemistry B*, 2022, **126**, 9911-9926.
8. F. Galeener, *Physical Review B*, 1979, **19**, 4292-4297.
9. C. Le Losq and D. R. Neuville, *Chemical Geology*, 2013, **346**, 57-71.
10. P. McMillan, B. Piriou and A. Navrotsky, *Geochimica et Cosmochimica Acta*, 1982, **46**, 2021-2037.
11. D. R. Neuville, L. Cormier, V. Montouillout, P. Florian, F. Millot, J. Rifflet and D. Massiot, *American Mineralogist*, 2008, **93**, 1721-1731.
12. D. R. Neuville and B. O. Mysen, *Geochimica et Cosmochimica Acta*, 1996, **60**, 1727-1737.
13. A. N. Novikov, D. R. Neuville, L. Hennet, Y. Gueguen, D. Thiaudiere, T. Charpentier and P. Florian, *Chemical Geology*, 2017, **461**, 115-127.
14. F. Seifert, B. O. Mysen and D. Virgo, *American Mineralogist*, 1982, **67**, 696-717.
15. P. Sen and M. Thorpe, *Physical Review B*, 1977, **15**, 4030-4038.
16. R. Brow, D. Tallant, S. Myers and C. Phifer, *Journal of Non-Crystalline Solids*, 1995, **191**, 45-55.
17. D. Palles, I. Konidakis, C. P. E. Varsamis and E. I. Kamitsos, *RSC Advances*, 2016, **6**, 16697-16710.
18. A. Yadav and P. Singh, *RSC Advances*, 2015, **5**, 67583-67609.
19. H. Gan and P. C. Hess, *American Mineralogist*, 1992, **77**, 495-506.
20. S. G. Kosinski, D. M. Krol, T. M. Duncan, D. C. Douglass, J. B. MacChesney and J. R. Simpson, *Journal of Non-Crystalline Solids*, 1988, **105**, 45-52.
21. B. O. Mysen, *Contributions to Mineralogy and Petrology*, 1998, **133**, 38-50.
22. B. O. Mysen, F. J. Ryerson and D. Virgo, *American mineralogist*, 1981, **66**, 106-117.
23. E. I. Kamitsos, *Physical Review B*, 1996, **53**, 14659-14662.
